# Supplementary material for: Identification and Expression Profiling of Toll-Like Receptors of Brown Trout (Salmo trutta) during Proliferative Kidney Disease
Source: PubMed Central journal article supplement (PMC7312180; doi:10.3390/ijms21113755), 2020-05-26
Supplement: ijms-21-03755-s001.pdf [file ijms-21-03755-s001.pdf]

**Supplementary Table S1: Abbreviation of gene symbols used in synteny analysis**

| <b>Sl</b> | <b>Gene symbol</b> | <b>Abbreviation</b>                                            |
|-----------|--------------------|----------------------------------------------------------------|
| 1         | ADRA2DA            | Alpha-2Da adrenergic receptor                                  |
| 2         | CGNA               | Cingulin A                                                     |
| 3         | CHRNA9             | Neuronal acetylcholine receptor subunit alpha-9                |
| 4         | CHRNB2             | Neuronal acetylcholine receptor subunit beta-2                 |
| 5         | FLAD1              | FAD synthase                                                   |
| 6         | FRMPD1             | FERM and PDZ domain-containing protein 1                       |
| 7         | INTS10             | Integrator complex subunit 10                                  |
| 8         | KLB                | Beta-klotho                                                    |
| 9         | LENEP              | Lens epithelial cell protein LEP503                            |
| 10        | PBXIP1B            | Pre-B-cell leukemia transcription factor-interacting protein 1 |
| 11        | S100-A1            | Protein S100-A1                                                |
| 12        | S100-A11           | Protein S100-A11                                               |
| 13        | S100-A16           | Protein S100-A16                                               |
| 14        | S100t              | Protein S100                                                   |
| 15        | SHC1               | SHC-transforming protein 1                                     |
| 16        | SHE                | SH2 domain-containing adapter protein E                        |
| 17        | SLC25A51           | Solute carrier family 25 member 51                             |
| 18        | TLR1               | Toll-like receptor 1                                           |
| 19        | TLR19              | Toll-like receptor 19                                          |
| 20        | TRIM 35-27         | Tripartite motif-containing 35-27                              |
| 21        | UBE2K              | Ubiquitin-conjugating enzyme E2 K                              |

**Supplementary Table S2. NCBI accession numbers of TLR amino acid sequences used for the construction of phylogenetic tree**

| <b>Sl</b> | <b>NCBI accession number</b> | <b>Name</b>                         |
|-----------|------------------------------|-------------------------------------|
| 1         | XP_005262719.1               | TLR1 <i>Homo sapiens</i>            |
| 2         | XP_006503914.1               | TLR1 <i>Mus musculus</i>            |
| 3         | TWW55543.1                   | TLR1 <i>Takifugu flavidus</i>       |
| 4         | ACT68332.1                   | TLR1 <i>Ctenopharyngodon idella</i> |
| 5         | ACV92063.1                   | TLR1 <i>Oncorhynchus mykiss</i>     |
| 6         | XP_010895755.1               | TLR1 <i>Esox lucius</i>             |
| 7         | XP_032384491.1               | TLR1 <i>Etheostoma spectabile</i>   |
| 8         | XP_028445178.1               | TLR1 <i>Perca flavescens</i>        |
| 9         | XP_026213132.1               | TLR1 <i>Anabas testudineus</i>      |
| 10        | XP_031175177.1               | TLR1 <i>Sander lucioperca</i>       |
| 11        | APM84340.1                   | TLR1 <i>Dicentrarchus labrax</i>    |
| 12        | XP_028271716.1               | TLR1 <i>Parambassis ranga</i>       |
| 13        | XP_022607278.1               | TLR1 <i>Seriola dumerili</i>        |
| 14        | AYM26735.1                   | TLR1 <i>Trachinotus ovatus</i>      |
| 15        | XP_026186162.1               | TLR1 <i>Mastacembelus armatus</i>   |
| 16        | XP_031600531.1               | TLR1 <i>Oreochromis aureus</i>      |
| 17        | AKJ66261.1                   | TLR1 <i>Miichthys miuiy</i>         |

|    |                           |                                         |
|----|---------------------------|-----------------------------------------|
| 18 | XP_027865028.1            | TLR1 <i>Xiphophorus couchianus</i>      |
| 19 | XP_019221940.1            | TLR1 <i>Oreochromis niloticus</i>       |
| 20 | XP_030252175.1            | TLR1 <i>Sparus aurata</i>               |
| 21 | XP_011478513.1            | TLR1 <i>Oryzias latipes</i>             |
| 22 | XP_026772609.1            | TLR1 <i>Pangasianodon hypophthalmus</i> |
| 23 | AEI59662.1                | TLR1 <i>Ictalurus punctatus</i>         |
| 24 | AAI63271.1                | TLR1 <i>Danio rerio</i>                 |
| 25 | XP_029587338.1<br>(TLR6)  | TLR1 <i>Salmo trutta</i>                |
| 26 | AUF71965.1                | TLR19 <i>Ctenopharyngodon idella</i>    |
| 27 | AEI59675.1                | TLR19 <i>Ictalurus punctatus</i>        |
| 28 | CDH93609.2                | TLR19 <i>Salmo salar</i>                |
| 29 | BAU98390.1                | TLR19 <i>Cyprinus carpio</i>            |
| 30 | APT35508.1                | TLR19 <i>Megalobrama amblycephala</i>   |
| 31 | NP_001352353.1            | TLR19 <i>Danio rerio</i>                |
| 32 | XP_029602002.1<br>(TLR12) | TLR19 <i>Salmo trutta</i>               |
| 33 | XP_021414698.1            | TLR13 Chr13 <i>Oncorhynchus mykiss</i>  |
| 34 | XP_014049954.1            | TLR13 Chrssa03 <i>Salmo salar</i>       |
| 35 | XP_018974763.1            | TLR13 Chr32 <i>Cyprinus carpio</i>      |
| 36 | XP_026073895.1            | TLR13 <i>Carassius auratus</i>          |

|    |                |                                       |
|----|----------------|---------------------------------------|
| 37 | XP_009303038.2 | TLR13 <i>Danio rerio</i>              |
| 38 | KAA0715757.1   | TLR13 <i>Triplophysa tibetana</i>     |
| 39 | XP_015464101.2 | TLR13 Chr19 <i>Astyanax mexicanus</i> |
| 40 | XP_024261195.1 | TLR13 <i>Oncorhynchus tshawytscha</i> |
| 41 | XP_029513396.1 | TLR13 <i>Oncorhynchus nerka</i>       |
| 42 | XP_026654751.1 | TLR13 <i>Zonotrichia albicollis</i>   |
| 43 | XP_030825523.1 | TLR13 <i>Camarhynchus parvulus</i>    |
| 44 | XP_029631730.1 | TLR13 Chr1 <i>Salmo trutta</i>        |
| 45 | XP_030237431.1 | TLR13 <i>Gadus morhua</i>             |
| 46 | XP_030630757.1 | TLR13 Chr5 <i>Chanos chanos</i>       |
| 47 | AUO16779.1     | TLR13 <i>Epinephelus coioides</i>     |
| 48 | XP_026203040.1 | TLR13 <i>Anabas testudineus</i>       |
| 49 | XP_023250866.1 | TLR13 <i>Seriolalalandi dorsalis</i>  |
| 50 | XP_018939858.1 | TLR13 Chr7 <i>Cyprinus carpio</i>     |
| 51 | RXN21033.1     | TLR13 <i>Labeo rohita</i>             |
| 52 | XP_026155776.1 | TLR13 <i>Mastacembelus armatus</i>    |
| 53 | XP_031652369.1 | TLR13 <i>Oncorhynchus kisutch</i>     |
| 54 | XP_021264186.1 | TLR13 <i>Numida meleagris</i>         |
| 55 | XP_029547005.1 | TLR13 Chr2 <i>Salmo trutta</i>        |

|    |                |                                          |
|----|----------------|------------------------------------------|
| 56 | XP_015463807.2 | TLR13 Chr12 <i>Astyanax mexicanus</i>    |
| 57 | XP_019897826.1 | TLR13 <i>Esox lucius</i>                 |
| 58 | XP_014005963.1 | TLR13 Chrssa16 <i>Salmo salar</i>        |
| 59 | XP_029612585.1 | TLR13 Chr6 <i>Salmo trutta</i>           |
| 60 | XP_018534808.1 | TLR13 <i>Lates calcarifer</i>            |
| 61 | XP_017579129.1 | TLR13 <i>Pygocentrus nattereri</i>       |
| 62 | XP_030634775.1 | TLR13 Chr7 <i>Chanos chanos</i>          |
| 63 | XP_026794334.1 | TLR13 <i>Pangasianodon hypophthalmus</i> |
| 64 | ROI81776.1     | TLR13 <i>Anabarrilius grahami</i>        |
| 65 | XP_029573484.1 | TLR13 Chr27 <i>Salmo trutta</i>          |
| 66 | XP_023844565.1 | TLR13 <i>Salvelinus alpinus</i>          |
| 67 | XP_021461145.1 | TLR13 Chr6 <i>Oncorhynchus mykiss</i>    |
| 68 | XP_031438389.1 | TLR13 <i>Clupea harengus</i>             |
| 69 | XP_007235237.2 | TLR13 Chr8 <i>Astyanax mexicanus</i>     |
